# Supplementary material
Source: publisher figshare collection journal article supplement (https://gsapubs.figshare.com/ndownloader/files/22747205)
Supplement: Supplementary file 1 [file 22747205]

## 1 **Appendix material online:**

2 Three models of radioactive “in-growth” melting processes have been proposed: 1)  
 3 reactive porous flow (RPF) (Spiegelman and Elliott, 1993;); 2) dynamic melting (DM)  
 4 (McKenzie, 1985;); and 3) flux melting (Thomas et al., 2002). In the Spiegelman and  
 5 Elliott (1993) model, melt moves through and continuously equilibrates with the solid as  
 6 it ascends. In the dynamic melting model, different residence times are created by  
 7 different extraction rates of elements into melt channels; once in channels, melt no longer  
 8 interacts with solid. These two models were developed for decompression melting but are  
 9 applicable to any melting whereby melt moves relative to residual peridotite. The flux  
 10 melting model is similar to dynamic melting except that a hydrous fluid (containing U  
 11 and Th) is added to the mantle wedge during the melting process (Thomas et al., 2002).

12 Melting rate can be defined as the mass of melt produced per unit time per volume of  
 13 peridotite entering the melting zone. Thus,  $\Gamma = M / tV$  where  $\Gamma$  is the melting rate,  $M$  is  
 14 the mass of melt produced,  $t$  is the duration of melting, and  $V$  is the volume of mantle that  
 15 becomes partially molten. If  $M = F\rho_s V$ , where  $F$  is the degree of melting and  $\rho_s$  is the  
 16 density of mantle peridotite and  $t = d/v_s$ , where  $v_s$  is subduction rate and  $d$  is the amount  
 17 of convergence in units of length, then the relationship between subduction rate and  
 18 melting rate can be described as  $\Gamma = F\rho_s v_s / d$  (equation. 1).

19 In all in-growth melting models, the source mineralogy is kept constant with 53%  
 20 olivine, 27% orthopyroxene, 17% clinopyroxene, and 3% spinel. This leads to bulk  
 21 partition coefficients for U, Th, Pa, and Ra of 0.0052, 0.0044,  $2.1 \times 10^{-6}$ , and  $8.9 \times 10^{-7}$ ,  
 22 respectively, based on the partition coefficients given in Blundy and Wood (2003).  
 23 However, because of the high oxygen fugacity in the overriding mantle wedge (Parkinson  
 24 and Arculus, 1999), we also assess the use of a <sup>solid/melt</sup> $D_U$  of 0.0026 (half that of Blundy  
 25 and Wood’s value). The melting rates used in three models are calculated from equation  
 26 (1). The equilibrium porous flow model uses equation (1) in (Spiegelman and Elliott,  
 27 1993). The dynamic melting model uses equation (A1)-(A4) given in Bourdon and Sims  
 28 (2003). For simplicity, the porosity is fixed as 0.002; this could underestimate the 231Pa  
 29 excess produced in equilibrium porous flow and dynamic melting models. The flux  
 30 melting model is that given in Thomas et al. (2002) using a spreadsheet generously  
 31 provided by Marc Hirschmann with a slight difference in the degree of melting in this

study (15%). The  $(^{231}\text{Pa})/(^{235}\text{U})$  and  $(^{230}\text{Th})/(^{238}\text{U})$  assumed for the fluid is 0.75. The parameters used for this model are summarized in online appendix Table DR2.

**Appendix Table DR1. U-series data of the Kick'em Jenny submarine volcano**

| Samples      | SiO <sub>2</sub><br>(wt.%) | U<br>(ppm) | $(^{234}\text{U})/(^{238}\text{U})$ | Th<br>(ppm) | U/Th  | Pa<br>(fg/g) | $(^{231}\text{Pa})/(^{235}\text{U})$ |
|--------------|----------------------------|------------|-------------------------------------|-------------|-------|--------------|--------------------------------------|
| RB07         | 55.53                      | 0.98       | 0.995                               | 2.52        | 0.390 | 833          | 2.61                                 |
| RB07*        |                            |            |                                     |             |       | 834          | 2.61                                 |
| RB07*        |                            |            |                                     |             |       | 863          | 2.70                                 |
| RB47         | 52.28                      | 4.88       | 0.993                               | 10.78       | 0.452 | 2975         | 1.88                                 |
| RB47*        |                            |            |                                     |             |       | 2975         | 1.88                                 |
| RB51b        | 51.17                      | 1.81       | 0.989                               | 3.86        | 0.469 | 1343         | 2.28                                 |
| RB64         | 52.31                      | 2.18       | 0.998                               | 5.12        | 0.427 | 1679         | 2.36                                 |
| RB65         | 53.11                      | 2.01       | 0.987                               | 5.30        | 0.379 | 1724         | 2.64                                 |
| RB79         | 47.57                      | 0.54       | 0.996                               | 1.25        | 0.427 | 271          | 1.56                                 |
| RB82         | 47.20                      | 0.93       | 0.998                               | 1.83        | 0.508 | 704          | 2.33                                 |
| KEJ100       | 51.74                      | 1.57       | 0.998                               | 3.14        | 0.501 | 1123         | 2.21                                 |
| KEJ101       | 48.56                      | 1.01       | 1.005                               | 2.00        | 0.507 | 755          | 2.29                                 |
| KEJ103       | 53.85                      | 3.15       | 0.998                               | 6.74        | 0.467 | 2106         | 2.06                                 |
| KEJ899       | 52.35                      | 1.69       | 0.989                               | 3.37        | 0.502 | 1266         | 2.30                                 |
| KEJ1976      | -                          | 1.17       | 0.992                               | 2.36        | 0.497 | 878          | 2.29                                 |
| BCR-2        | -                          | 1.70       | -                                   | -           | -     | 551±17       | 1.00±0.03                            |
| KEJ100-G+W** | 57                         | 1.84       | 1.00                                | 3.09        | 0.595 | 1292         | 2.15                                 |

\*, Duplicate analysis. \*\*, SiO<sub>2</sub> and U-Th data of KEJ100-G+W are from Gill and Williams (1990) and Pa data are from Pickett and Murrell (1997). U-Th-Pa data were analyzed by MC-ICP-MS. The  $^{233}\text{Pa}$  spike was milked from  $^{237}\text{Np}$  following procedures described in Regelous et al. (2004). The  $^{233}\text{Pa}$  spike was calibrated by five analyses of rock standard BCR-2 and six more BCR-2 were measured as unknown.  $(^{231}\text{Pa})/(^{235}\text{U})$  of BCR-2 is calculated based on U content of 1.70 ppm. Error of Pa content and  $(^{231}\text{Pa})/(^{235}\text{U})$  of BCR-2 are one standard deviation from six analyses of BCR-2. Duplicate analyses of standards and KEJ samples indicate reproducibility of +/- 2.5% on  $^{231}\text{Pa}$ .

48 **Appendix Table DR2. Parameters in melting models.**

49

| Name                                      | Value | units                |
|-------------------------------------------|-------|----------------------|
| melting rate ( $\Gamma$ )                 | -     | kg/m <sup>3</sup> /y |
| melting degree ( $F$ )                    | 0.15  | -                    |
| density of mantle peridotite ( $\rho_s$ ) | 3340  | kg/m <sup>3</sup>    |
| density of melt ( $\rho_l$ )              | 2800  | kg/m <sup>3</sup>    |
| Subduction rate ( $v_s$ )                 | -     | cm/y                 |
| Amount of convergence ( $d$ )             | 90    | km                   |
| Porosity                                  | 0.002 | -                    |

50

51

52 References cited in online supplement:

53 Bourdon, B. and Sims, K., 2003, U-series constraints on intraplate basaltic magmatism,: Reviews in  
 54 Mineralogy and Geochemistry, v. 52, p. 215-254.

55 Gill J.B. and Williams, R.W., 1990, Th isotope and U-series studies of subduction-related volcanic rocks,  
 56 Geochimica et Cosmochimica Acta, v. 54, p. 1427-1442.

57 Lundstrom, C.C., Gill, J., Williams, Q., and Perfit, M.R., 1995, Mantle melting and basalt extraction by  
 58 equilibrium porous flow: Science, v. 270, p. 1958-1961.

59 McKenzie, D., 1985, <sup>230</sup>Th-<sup>238</sup>U disequilibrium and the melting process beneath ridge axes: Earth and  
 60 Planetary Science Letters, v. 72, p. 149-157.

61 Parkinson, I.J., and Arculus, R.J., 1999, The redox state of subduction zones: insights from arc-peridotites:  
 62 Chemical Geology, v. 160, p. 409-423.

63 Pickett, D.A., and Murrell, M.T., 1997, Observation of <sup>231</sup>Pa/<sup>235</sup>U disequilibrium in volcanic rocks: Earth  
 64 and Planetary Science Letters, v. 148, p. 259-271.

65 Regelous, M., Turner, S., Elliott, T.R., Rostami, K., Hawkesworth, C.J., 2004, Rapid measurement of  
 66 femtogram quantities of Protactinium in silicate rock samples by multicollector inductively  
 67 coupled plasma mass spectrometry: Anal. Chem., 76, 3584-3589.

68 Spiegelman, M., and Elliott, T., 1993, Consequences of melt transport for uranium series disequilibrium in  
 69 young lavas: Earth and Planetary Science Letters, v. 118, p. 1-20.

70 Thomas, R.B., Hirschmann, M.M., Cheng, H., Reagan, M.K., and Edwards, R.L., 2002, (<sup>231</sup>Pa/<sup>235</sup>U)-  
 71 (<sup>230</sup>Th/<sup>238</sup>U) of young mafic volcanic rocks from Nicaragua and Costa Rica and the influence of  
 72 flux melting on U-series systematics of arc lavas: Geochimica et Cosmochimica Acta, v. 66, p.  
 73 4287-4309.

74 Williams, R.W., and Gill, J.B., 1989, Effects of partial melting on the uranium decay series: Geochimica et  
 75 Cosmochimica Acta, v. 53, p. 1607-1619.
